# Supplementary material for: Part 2: Joint multifractal analysis of available wind power and rain intensity from an operational wind farm
Source: Copernicus journal article supplement (doi:10.5194/npg-2024-6), 2024-02-02
Supplement: Supplementary file [file npg-2024-6-RC2-supplement.pdf]

Manuscript number :NPG-2024-6

Title : Part 2: Joint multifractal analysis of available wind power and rain intensity from an operational wind farm

*Jerry Jose, Auguste Gires, Ernani Schnorenberger, Yelva Roustan, Daniel Schertzer, Ioulia Tchiguirinskaia*

## Review comments

This study entitled « Joint multifractal analysis of available wind power and rain intensity», investigates the quantification of the effect of rainfall on wind power through the scale invariant framework of Universal Multifractals.

This manuscript is structured as follows : after an introduction part, in the part 2 the authors describe the framework of UM and JMF. In the part 3 the results of analyses of UM and JMF are presented for respectively individual and jointly data fields. The part 4 concerns a discussion part on the influence of rain type as well as that of wind direction on power production. Section 5 concludes the study and summarizes the results.

*In this study, the authors propose a new parameter JMF, from UM framework, to quantify the effect of rain on wind power output. This is represented a novelty for the scientific community and can be interest the eolian energy scientific community. However, the power output analyzed are values of available power output, instead of actual power output due to the presence of biais as indicated by the authors. For the understanding, this would relevant to insert the reference explaining this point or add in the manuscript the corresponding simulations.*

---

## Minor Revisions

I suggest to authors to zoom the following result figures n°3, 4, 11-14, A1 and A2. In fig. 3,  $K(q)$  curve represented in dotted red line is not visible.  
Typos : line page 16 line 358 (see section ??)..
